# Supplementary material for: Dulce María Escalona: homenaje y proyección en la enseñanza de la matemática
Source: MDPI journal article supplement (doi:10.3390/foods11040549), 2011-01-01
Supplement: s1 [file s1]

## Supplementary Materials

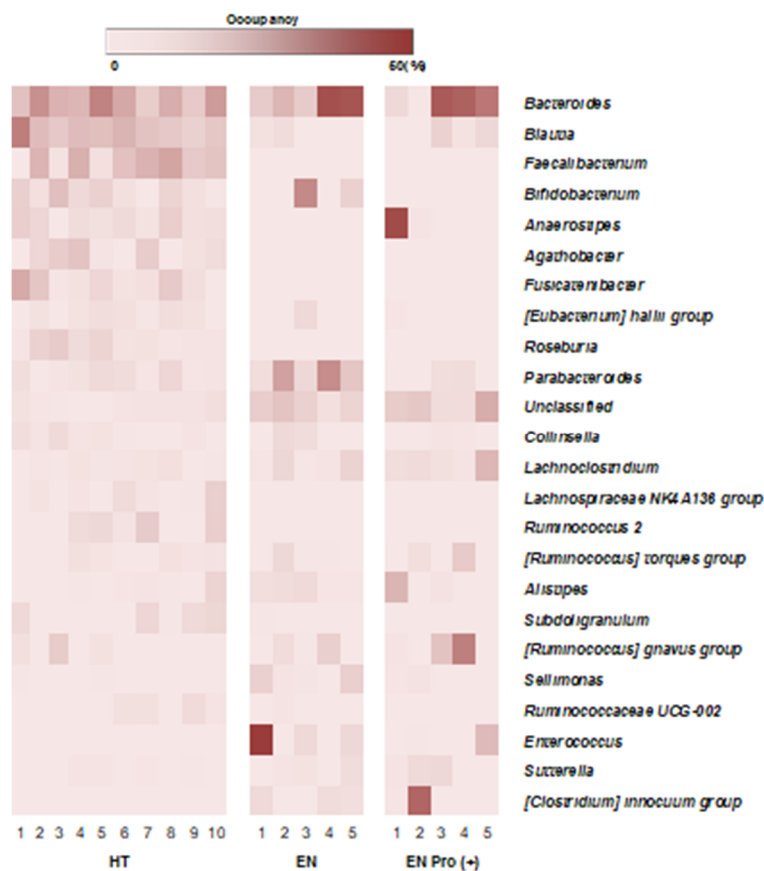

Figure S1. Heat map of intestinal microbiota.

Table S1. Correlation analysis between intestinal microbiota and metabolites.

| Metabolites and Intestinal Bacteria  | Rs     | p-Value |
|--------------------------------------|--------|---------|
| Butyric acid                         |        |         |
| <i>Blautia</i>                       | 0.467  | 0.038   |
| <i>Anaerostipes</i>                  | 0.525  | 0.017   |
| <i>Roseburia</i>                     | 0.496  | 0.026   |
| <i>Agathobacter</i>                  | 0.520  | 0.019   |
| <i>Lachnospiraceae</i> NK4A136 group | 0.511  | 0.021   |
| <i>Parabacteroides</i>               | -0.547 | 0.013   |
| <i>Sellimonas</i>                    | -0.475 | 0.034   |
| Pyruvic acid                         |        |         |
| <i>Anaerostipes</i>                  | 0.724  | 0.000   |
| <i>Roseburia</i>                     | 0.446  | 0.049   |
| <i>Fusicatenibacter</i>              | 0.587  | 0.007   |
| 2-Hydroxyisobutyric acid             |        |         |
| Unclassified                         | 0.485  | 0.030   |
| <i>Sellimonas</i>                    | 0.665  | 0.001   |
| <i>(Clostridium) innocuum</i> group  | 0.528  | 0.017   |

|                                      |        |       |
|--------------------------------------|--------|-------|
| <i>Blautia</i>                       | -0.490 | 0.028 |
| <i>Roseburia</i>                     | -0.491 | 0.028 |
| <i>Faecalibacterium</i>              | -0.551 | 0.012 |
| <i>Lachnospiraceae</i> NK4A136 group | -0.477 | 0.033 |
| <i>Alistipes</i>                     | -0.586 | 0.007 |
